# Supplementary material
Source: PubMed Central journal article supplement (PMC5264317)
Supplement: NIHMS838913-supplement.pdf [file NIHMS838913-supplement.pdf]

**This survey was developed by researchers at the University of California, San Francisco and the Harvard T.H. Chan School of Public Health, and posted to Amazon's Mechanical Turk (MTurk) in November 2015.**  
**A sample of the survey questions are provided below.**

---

**Screener questions:**

In the past 12 months, have you received benefits from any of the following government programs? Select all that apply.

- WIC (Women, Infants and Children)
- SNAP (Supplemental Nutrition Assistance Program) or the Food Stamp Program
- TANF (Temporary Assistance for Needy Families)
- SSI (Supplemental Security Income)
- None of the above

Which of the statements best describe the food eaten in your household in the last month?<sup>a</sup>

- Enough of the foods we want to eat
- Enough but not always the kinds of food we want to eat
- Sometimes not enough to eat
- Often not enough to eat

*\*Note: SNAP participants were defined as survey respondents who indicated reported receiving SNAP benefits in the past 12 months. Nonparticipants were defined as survey respondents who did not receive SNAP benefits in the past 12 months, but reported "enough but not always the kinds of food we want to eat", "sometimes not enough to eat," or "often not enough to eat"*

**Questions asked to SNAP participants and nonparticipants:**

Would you support or oppose the following policy changes to SNAP (the Food Stamp Program) to improve participants' diets?

1. Providing additional money to SNAP participants that can only be used on fruits, vegetables, or other healthful foods.

- Strongly support
- Somewhat support
- Oppose somewhat
- Strongly oppose

---

<sup>a</sup> USDA Food Sufficiency Question/Screenener:  
[www.ers.usda.gov/datafiles/Food\\_Security\\_in\\_the\\_United\\_States/Food\\_Security\\_Survey\\_Modules/hh2012.pdf](http://www.ers.usda.gov/datafiles/Food_Security_in_the_United_States/Food_Security_Survey_Modules/hh2012.pdf).

2. Removing sugary drinks (such as soda) from the list of products that can be purchased using SNAP.
- Strongly support
  - Somewhat support
  - Oppose somewhat
  - Strongly oppose
3. Both removing sugary drinks from the list of products that can be purchased using SNAP and providing additional money that can only be used on fruits, vegetables, or other healthful foods.
- Strongly support
  - Somewhat support
  - Oppose somewhat
  - Strongly oppose
4. Expanding SNAP so that participants have more benefits to guarantee enough to eat and good nutrition.
- Strongly support
  - Somewhat support
  - Oppose somewhat
  - Strongly oppose
5. Providing more nutrition education classes or cooking classes to SNAP participants.
- Strongly support
  - Somewhat support
  - Oppose somewhat
  - Strongly oppose
6. Imagine there was a different type of SNAP (Food Stamp) program called SNAP+. The only differences between SNAP+ and the current SNAP program are:
- a. SNAP+ gives more benefits for healthful foods like fruits and vegetables
  - b. SNAP+ does not allow the use of any SNAP benefits to buy soda and other sugary drinks.
- Which program would you choose?
- SNAP+
  - SNAP as it currently is
7. Imagine there was a different type of SNAP (Food Stamp) program called SNAP+. The only differences between SNAP+ and the current SNAP program are:
- a. SNAP+ gives more benefits for healthful foods like fruits and vegetables
  - b. SNAP+ does not allow the use of any SNAP benefits to buy soda and other sugary drinks.

c. SNAP+ gives you **10% more benefits** than the current SNAP program. For example, if you currently get \$100/month from SNAP, you would get \$110/month only on SNAP+.

Which program would you choose?

- SNAP+
- SNAP as it currently is

8. Imagine there was a different type of SNAP (Food Stamp) program called SNAP+. The only differences between SNAP+ and the current SNAP program are:

- a. SNAP+ gives more benefits for healthful foods like fruits and vegetables
- b. SNAP+ does not allow the use of any SNAP benefits to buy soda and other sugary drinks.
- c. SNAP+ gives you **25% more benefits** than the current SNAP program. For example, if you currently get \$100/month from SNAP, you would get \$125/month only on SNAP+.

Which program would you choose?

- SNAP+
- SNAP as it currently is

9. Imagine there was a different type of SNAP (Food Stamp) program called SNAP+. The only differences between SNAP+ and the current SNAP program are:

- a. SNAP+ gives more benefits for healthful foods like fruits and vegetables
- b. SNAP+ does not allow the use of any SNAP benefits to buy soda and other sugary drinks.
- c. SNAP+ gives you **50% more benefits** than the current SNAP program. For example, if you currently get \$100/month from SNAP, you would get \$150/month only on SNAP+.

Which program would you choose?

- SNAP+
- SNAP as it currently is
